# Supplementary material for: Metformin increases natural killer cell functions in head and neck squamous cell carcinoma through CXCL1 inhibition
Source: HighWire-hosted journal article supplement (doi:10.1136/jitc-2022-005632), 2022-11-01
Supplement: jitc-2022-005632supp005_data_supplement.pdf [file jitc-2022-005632supp005_data_supplement.pdf]

| Pt. No | Sex | Age | Race      | TNM      | Stage | Site       | Outcome | Outcome-2      |
|--------|-----|-----|-----------|----------|-------|------------|---------|----------------|
| 1      | M   | 53  | Caucasian | T3N1M0   | III   | Larynx     | Alive   | No progression |
| 3      | M   | 46  | Caucasian | T1N2bM0  | IVA   | Oropharynx | Alive   | No progression |
| 5      | M   | 47  | Caucasian | T1N2bM0  | IVA   | Oropharynx | Alive   | No progression |
| 7      | M   | 62  | Caucasian | TN2bM0   | IVA   | Oropharynx | Alive   | No progression |
| 8      | M   | 61  | Caucasian | T2N2cM0  | IVA   | Oropharynx | Alive   | No progression |
| 10     | M   | 65  | Caucasian | T4aN2M0  | IVA   | Oropharynx | Alive   | No progression |
| 12     | M   | 55  | Caucasian | T1N2bM0  | IVA   | Larynx     | Alive   | Progressed     |
| 13     | M   | 59  | AF        | T4aN0M0  | IVA   | Oropharynx | Alive   | No progression |
| 15     | F   | 47  | AF        | T2N2cM0  | IVA   | Larynx     | Alive   | No progression |
| 16     | F   | 34  | Caucasian | T2N2bM0  | IVA   | Oropharynx | Alive   | No progression |
| 17     | M   | 64  | Caucasian | T3N3M0   | IVB   | Oropharynx | Alive   | No progression |
| 18     | M   | 54  | Caucasian | T4aN2bM0 | IVA   | Oropharynx | Alive   | No progression |
| 20     | M   | 58  | Caucasian | T4aN3M0  | IVB   | Oropharynx | Alive   | No progression |
| 21     | M   | 57  | Caucasian | T4aN2cM0 | IVA   | Oropharynx | Alive   | No progression |
