# Supplementary material for: Metformin increases natural killer cell functions in head and neck squamous cell carcinoma through CXCL1 inhibition
Source: PubMed Central journal article supplement — J Immunother Cancer. 2022 Nov 3;10(11):e005632. doi: 10.1136/jitc-2022-005632 (PMC9639146; doi:10.1136/jitc-2022-005632), 2022-11-03
Supplement: jitc-2022-005632supp006.pdf [file jitc-2022-005632supp006.pdf]

| Pt. No | Sex    | Age | TNM      | Stage | Site        | HPV Status  |
|--------|--------|-----|----------|-------|-------------|-------------|
| 33     | Male   | 49  | T3N2aM0  | II    | Oropharynx  | Positive    |
| 34     | Male   | 61  | T3N2bM0  | III   | Oropharynx  | Positive    |
| 36     | Male   | 54  | T4aN0M0  | II    | Larynx      | Not Assesed |
| 39     | Male   | 59  | T1N1M0   | II    | Oral Cavity | Not Assesed |
| 40     | Male   | 52  | T1N0M0   | II    | Larynx      | Not Assesed |
| 45     | Female | 66  | T4aN2bM0 | II    | Oral Cavity | Not Assesed |
| 46     | Male   | 59  | T1N3M0   | III   | Oropharynx  | Not Assesed |
| 48     | Female | 60  | T1N0M0   | II    | Larynx      | Not Assesed |
| 50     | Male   | 60  | T2N2bM0  | II    | Oral Cavity | Not Assesed |
