# Supplementary figures and images for: Metformin increases natural killer cell functions in head and neck squamous cell carcinoma through CXCL1 inhibition
Source: PubMed Central journal article supplement — J Immunother Cancer. 2022 Nov 3;10(11):e005632. doi: 10.1136/jitc-2022-005632 (PMC9639146; doi:10.1136/jitc-2022-005632), 2022-11-03

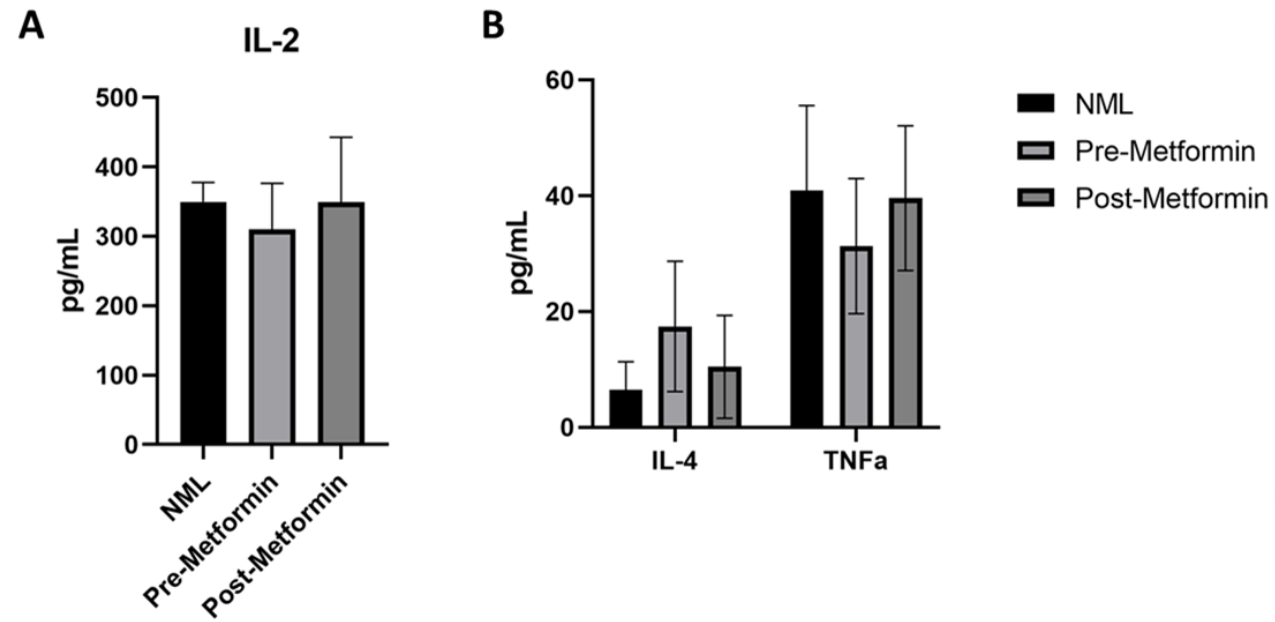

Supplement: jitc-2022-005632supp002.pdf [file jitc-2022-005632supp002.pdf]
