# Supplementary figures and images for: Metformin increases natural killer cell functions in head and neck squamous cell carcinoma through CXCL1 inhibition
Source: HighWire-hosted journal article supplement (doi:10.1136/jitc-2022-005632), 2022-11-01

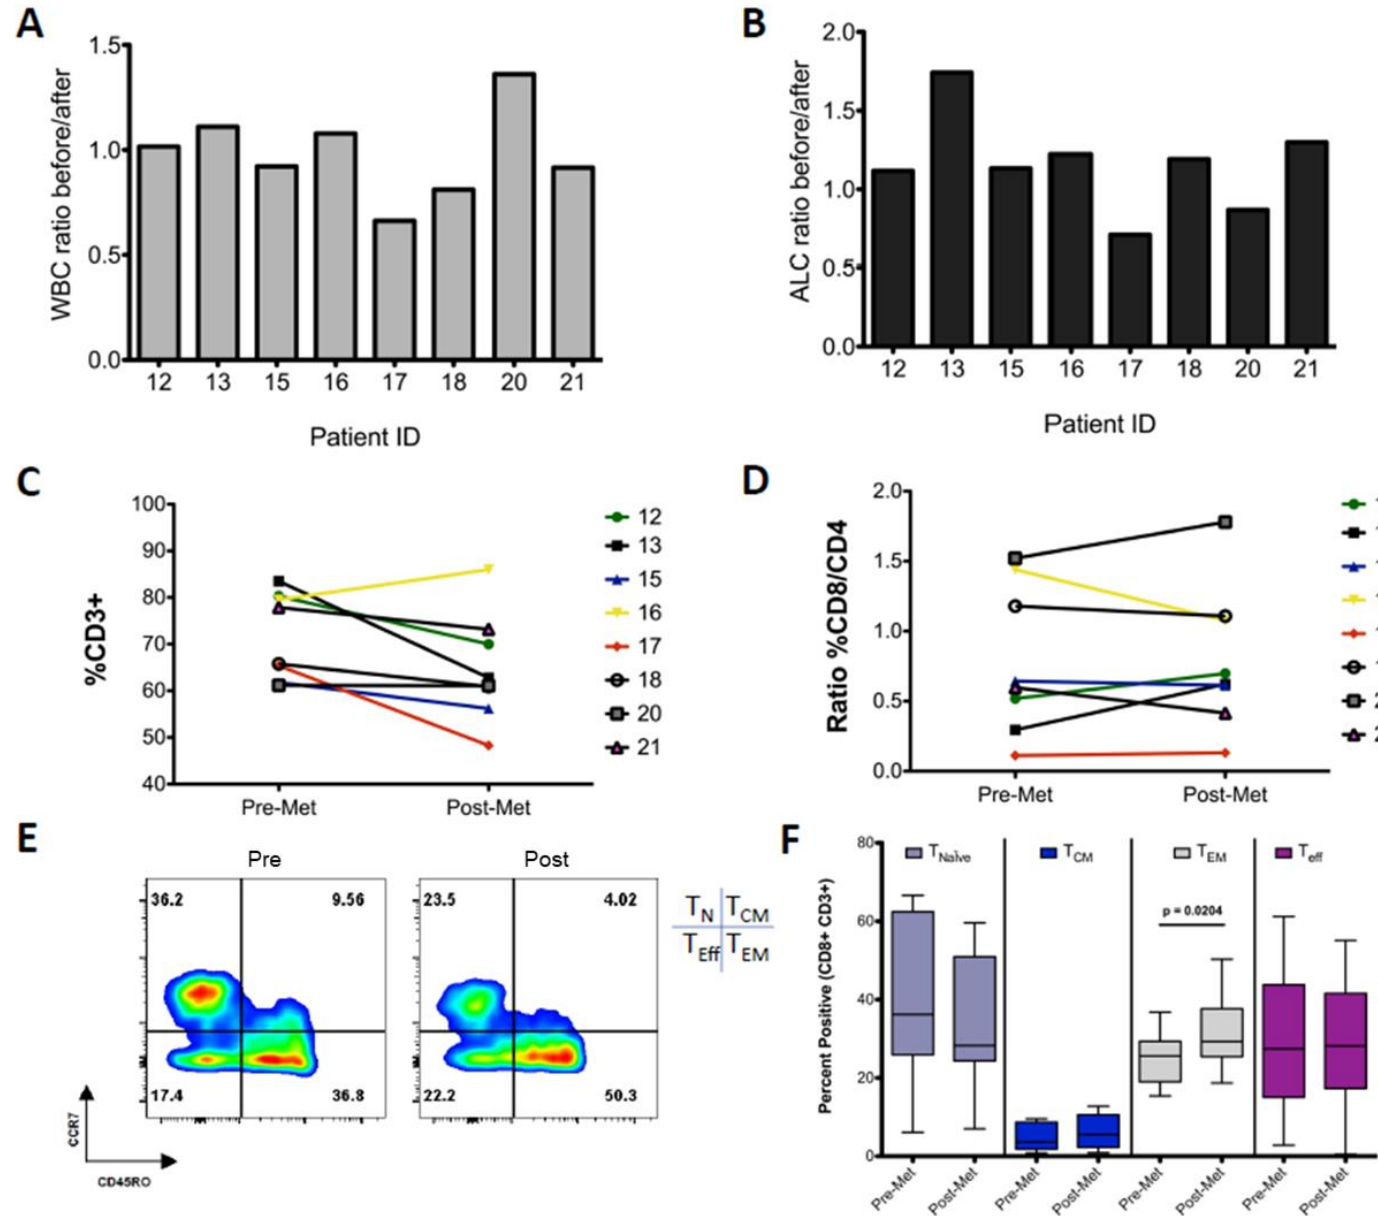

Supplement: jitc-2022-005632supp003_data_supplement.pdf [file jitc-2022-005632supp003_data_supplement.pdf]

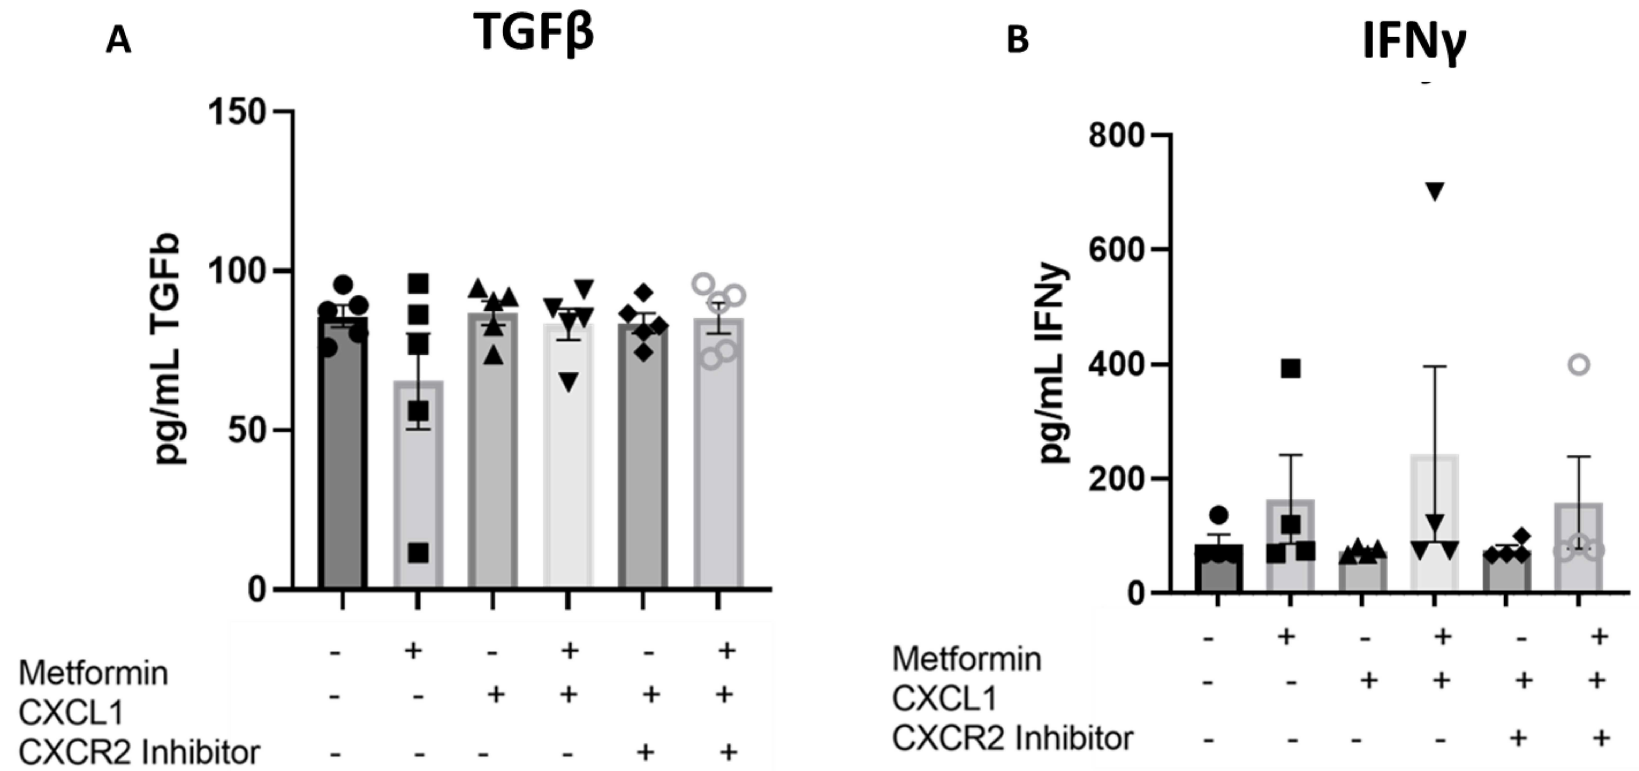

Supplement: jitc-2022-005632supp004_data_supplement.pdf [file jitc-2022-005632supp004_data_supplement.pdf]
